# Supplementary material
Source: publisher figshare collection journal article supplement (https://sage.figshare.com/ndownloader/files/17090120)
Supplement: Supplementary file 1 [file 17090120]

**Supplementary Table 2** Sensitivity analysis of adjusted analysis with propensity score stratified for surgical approach.

|                                | Open surgery                  |                | Laparoscopic surgery          |                |
|--------------------------------|-------------------------------|----------------|-------------------------------|----------------|
|                                | OR (95% CI)*                  | <i>P</i> value | OR (95% CI)*                  | <i>P</i> value |
| Reoperations                   | 0.5 (0.2 – 1.2)               | 0.127          | 0.4 (0.1 – 1.6)               | 0.178          |
| Colorectal anastomotic leakage | 0.6 (0.2 – 1.6)               | 0.315          | 0.6 (0.1 – 3.4)               | 0.605          |
|                                | Linear regression coefficient |                | Linear regression coefficient |                |
| Hospital stay                  | -1.3 (-3.8 – 1.2)             | 0.313          | 0.9 (-3.1 -5.0)               | 0.445          |

\*Odds ratio and 95% confidence interval
